# Supplementary material
Source: PubMed Central journal article supplement (PMC8900494)
Supplement: NIHMS1782140-supplement-1.pdf [file NIHMS1782140-supplement-1.pdf]

**Supplemental Table S1**

| Species (as given in the source reference) | Opsin class | Lambda-max-A1 | Lambda-max-A2 | Supplemental Reference |
|--------------------------------------------|-------------|---------------|---------------|------------------------|
| <i>Danio rerio</i>                         | SWS2        | 411           | 412           | 1                      |
| <i>Danio rerio</i>                         | RH2         | 482           | 504           | 1                      |
| <i>Danio rerio</i>                         | RH1         | 503           | 527           | 1                      |
| <i>Danio rerio</i>                         | LWS         | 565           | 613           | 1                      |
| <i>Carassius auratus</i>                   | SWS1        | 370.1         | 381.9         | 2                      |
| <i>Carassius auratus</i>                   | SWS2        | 447.2         | 454.1         | 2                      |
| <i>Carassius auratus</i>                   | RH1         | 502.7         | 522.2         | 2                      |
| <i>Carassius auratus</i>                   | RH2         | 515.9         | 534.9         | 2                      |
| <i>Carassius auratus</i>                   | LWS         | 565.6         | 617.5         | 2                      |
| <i>Lithobates pipiens</i>                  | SWS2        | 432           | 438           | 3                      |
| <i>Lithobates pipiens</i>                  | RH1         | 502           | 527           | 3                      |
| <i>Lithobates pipiens</i>                  | LWS         | 575           | 620           | 3                      |
| <i>Bos taurus</i>                          | RH1         | 498           | 520           | 4                      |
| <i>Gallus gallus</i>                       | LWS         | 562           | 613           | 5                      |
| <i>Petromyzon marinus</i>                  | RH1         | 497           | 518           | 6,7                    |
| <i>Dorosoma cepedianum</i>                 | RH1         | 500           | 521           | 7,8                    |
| <i>Alosa pseudoharengus</i>                | RH1         | 504           | 528           | 7,9                    |
| <i>Oncorhynchus gorbuscha</i>              | RH1         | 503           | 527           | 7,10                   |
| <i>Coregonus sp.</i>                       | RH1         | 509           | 536           | 7,11                   |
| <i>Osteoglossum bicirrhosum</i>            | RH1         | 503           | 527           | 7,9                    |
| <i>Xenomystus migri</i>                    | RH1         | 503           | 527           | 7,9                    |
| <i>Gasteropelecus levis</i>                | RH1         | 503           | 527           | 7,9                    |
| <i>Arnoldichthys spilopterus</i>           | RH1         | 503           | 527           | 7,9                    |
| <i>Abramites microcephalus</i>             | RH1         | 503           | 527           | 7,9                    |
| <i>Hemiodus semitaeniatus</i>              | RH1         | 503           | 527           | 7,9                    |
| <i>Scardinius erythrophthalmis</i>         | RH1         | 507           | 535           | 7,12                   |
| <i>Pimephales notatus</i>                  | RH1         | 505           | 535           | 7,8                    |
| <i>Notemigonus crysoleucas auratus</i>     | RH1         | 502           | 529           | 7,8                    |
| <i>Notemigonus crysoleucas boscii</i>      | RH1         | 504           | 532           | 7,8                    |
| <i>Hybopsis biguttata</i>                  | RH1         | 505           | 535           | 7,8                    |
| <i>Alburnus lucidus</i>                    | RH1         | 510           | 533           | 7,13                   |
| <i>Barbus fasciolatus</i>                  | RH1         | 500           | 522           | 7,9                    |
| <i>Jordanella floridae</i>                 | RH1         | 500           | 522           | 7,9                    |
| <i>Belonesox belizanus</i>                 | RH1         | 498           | 521           | 7,8                    |
| <i>Morone labrax</i>                       | RH1         | 502           | 534           | 7,14                   |
| <i>Lates nilotica</i>                      | RH1         | 499           | 520           | 7                      |
| <i>Oblada sp.</i>                          | RH1         | 501           | 522           | 7,14                   |
| <i>Aequidens portalegrensis</i>            | RH1         | 500           | 522           | 7,9                    |
| <i>Symphysodon aequifasciata</i>           | RH1         | 497           | 516           | 7,9                    |
| <i>Tilapia nilotica</i>                    | RH1         | 503           | 527           | 7,9                    |
| <i>Tilapia melanopleura</i>                | RH1         | 499           | 520           | 7                      |

|                               |      |     |     |      |
|-------------------------------|------|-----|-----|------|
| <i>Labrus merula</i>          | RH1  | 492 | 510 | 15   |
| <i>Helostoma temmincki</i>    | RH1  | 500 | 522 | 7,9  |
| <i>Mugil cephalus</i>         | RH1  | 499 | 522 | 7,8  |
| <i>Gasterosteus aculeatus</i> | RH1  | 501 | 522 | 7,16 |
| <i>Sphaeroides annulatus</i>  | RH1  | 500 | 522 | 7,17 |
| <i>Tetraodon schoutedeni</i>  | RH1  | 503 | 527 | 7,9  |
| <i>Xenopus laevis</i>         | RH1  | 502 | 523 | 7,18 |
| <i>Rana temporaria</i>        | RH1  | 502 | 523 | 7,19 |
| <i>Aristomias scintillans</i> | RH1  | 526 | 551 | 20   |
| <i>Aristomias grimaldii</i>   | RH1  | 517 | 552 | 21   |
| <i>Malacosteus niger</i>      | RH1  | 522 | 548 | 21   |
| <i>Pachystomias microdon</i>  | RH1  | 515 | 543 | 21   |
| <i>Oncorhynchus mykiss</i>    | SWS2 | 434 | 441 | 22   |
| <i>Ambystoma tigrinum</i>     | LWS  | 562 | 620 | 23   |
| <i>Ambystoma tigrinum</i>     | RH1  | 502 | 521 | 23   |
| <i>Ambystoma tigrinum</i>     | SWS2 | 432 | 440 | 23   |

## Supplemental References

- 1 Allison, W. T., Haimberger, T. J., Hawryshyn, C. W. & Temple, S. E. Visual pigment composition in zebrafish: Evidence for a rhodopsin-porphyrin interchange system. *Visual neuroscience* **21**, 945-952, doi:10.1017/s0952523804216145 (2004).
- 2 Parry, J. W. & Bowmaker, J. K. Visual pigment reconstitution in intact goldfish retina using synthetic retinaldehyde isomers. *Vision research* **40**, 2241-2247, doi:10.1016/s0042-6989(00)00101-2 (2000).
- 3 Liebman, P. A. & Entine, G. Visual pigments of frog and tadpole (*Rana pipiens*). *Vision research* **8**, 761-775 (1968).
- 4 Koutalos, Y. *et al.* Regeneration of bovine and octopus opsins in situ with natural and artificial retinals. *Biochemistry* **28**, 2732-2739, doi:10.1021/bi00432a055 (1989).
- 5 Chen, J. G. *et al.* Wavelength regulation in iodopsin, a cone pigment. *Biophysical journal* **55**, 725-729, doi:10.1016/s0006-3495(89)82871-1 (1989).
- 6 Wald, G. The metamorphosis of visual systems in the sea lamprey. *The Journal of general physiology* **40**, 901-914 (1957).
- 7 Lythgoe, J. N. in *Handbook of Sensory Physiology VII/1: Photochemistry of Vision* (ed H. J. A. Dartnall) 602-624 (Springer-Verlag, 1972).
- 8 Bridges, C. D. B. Periodicity of absorption properties of pigments based on vitamin A<sub>2</sub> from fish retinae. *Nature* **203**, 303-304, doi:10.1038/203303a0 (1964).
- 9 Schwanzara, S. A. The visual pigments of freshwater fishes. *Vision research* **7**, 121-148 (1967).
- 10 Munz, F. W. & Beatty, D. D. A critical analysis of the visual pigments of salmon and trout. *Vision research* **5**, 1-17, doi:10.1016/0042-6989(65)90071-4 (1965).
- 11 Bridges, C. D. & Yoshikami, S. Distribution and evolution of visual pigments in salmonid fishes. *Vision research* **10**, 609-626, doi:10.1016/0042-6989(70)90010-6 (1970).
- 12 Bridges, C. D. & Yoshikami, S. The rhodopsin-porphyrin system in freshwater fishes. 1. Effects of age and photic environment. *Vision research* **10**, 1315-1332, doi:10.1016/0042-6989(70)90084-2 (1970).
- 13 Dartnall, H. J. Visual pigments of the bleak (*Alburnus lucidus*). *The Journal of physiology* **128**, 131-156, doi:10.1113/jphysiol.1955.sp005296 (1955).
- 14 Dartnall, H. J. & Lythgoe, J. N. The spectral clustering of visual pigments. *Vision research* **5**, 81-100 (1965).
- 15 Wald, G. in *Comparative Biochemistry, Vol. 1* (Academic Press, 1960).

- 16 Munz, F. W. *The photosensitive retinal pigments of marine and euryhaline teleost fishes*. (Ph.D. Thesis, University of California, Los Angeles, 1957).
- 17 Munz, F. W. The photosensitive retinal pigments of fishes from relatively turbid coastal waters. *The Journal of general physiology* **42**, 445-459, doi:10.1085/jgp.42.2.445 (1958).
- 18 Dartnall, H. J. Further observations on the visual pigments of the clawed toad, *Xenopus laevis*. *The Journal of physiology* **134**, 327-338, doi:10.1113/jphysiol.1956.sp005646 (1956).
- 19 Muntz, W. R. & Reuter, T. Visual pigments and spectral sensitivity in *Rana temporaria* and other European tadpoles. *Vision research* **6**, 601-618 (1966).
- 20 O'Day, W. T. & Fernandez, H. R. *Aristostomias scintillans* (Malacosteidae): a deep-sea fish with visual pigments apparently adapted to its own bioluminescence. *Vision research* **14**, 545-550, doi:10.1016/0042-6989(74)90044-3 (1974).
- 21 Bowmaker, J. K., Dartnall, H.J.A., Herring, P.J. Longwave-sensitive visual pigments in some deep-sea fishes: segregation of 'paired' rhodopsins and porphyropsins. *J. Comp. Physiol. A* **163**, 685-698 (1988).
- 22 Hawryshyn, C. W. & Hárosi, F. I. Spectral characteristics of visual pigments in rainbow trout (*Oncorhynchus mykiss*). *Vision research* **34**, 1385-1392, doi:10.1016/0042-6989(94)90137-6 (1994).
- 23 Makino, C. L., Groesbeek, M., Lugtenburg, J. & Baylor, D. A. Spectral tuning in salamander visual pigments studied with dihydroretinal chromophores. *Biophysical journal* **77**, 1024-1035, doi:10.1016/s0006-3495(99)76953-5 (1999).
